# Supplementary material for: Brief communication: Spatial and temporal variations in surface snow chemistry along a traverse from coastal East Antarctica to the ice sheet summit (Dome A)
Source: Copernicus journal article supplement (doi:10.5194/tc-15-1087-2021), 2021-03-01
Supplement: Supplementary file 1 [file tc-15-1087-2021-supplement.pdf]

Supplement of The Cryosphere, 15, 1087–1095, 2021  
<https://doi.org/10.5194/tc-15-1087-2021-supplement>  
© Author(s) 2021. This work is distributed under  
the Creative Commons Attribution 4.0 License.

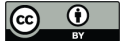

*Supplement of*

**Brief communication: Spatial and temporal variations in surface snow chemistry along a traverse from coastal East Antarctica to the ice sheet summit (Dome A)**

**Guitao Shi et al.**

*Correspondence to:* Guitao Shi (gtshi@geo.ecnu.edu.cn)

The copyright of individual parts of the supplement might differ from the CC BY 4.0 License.

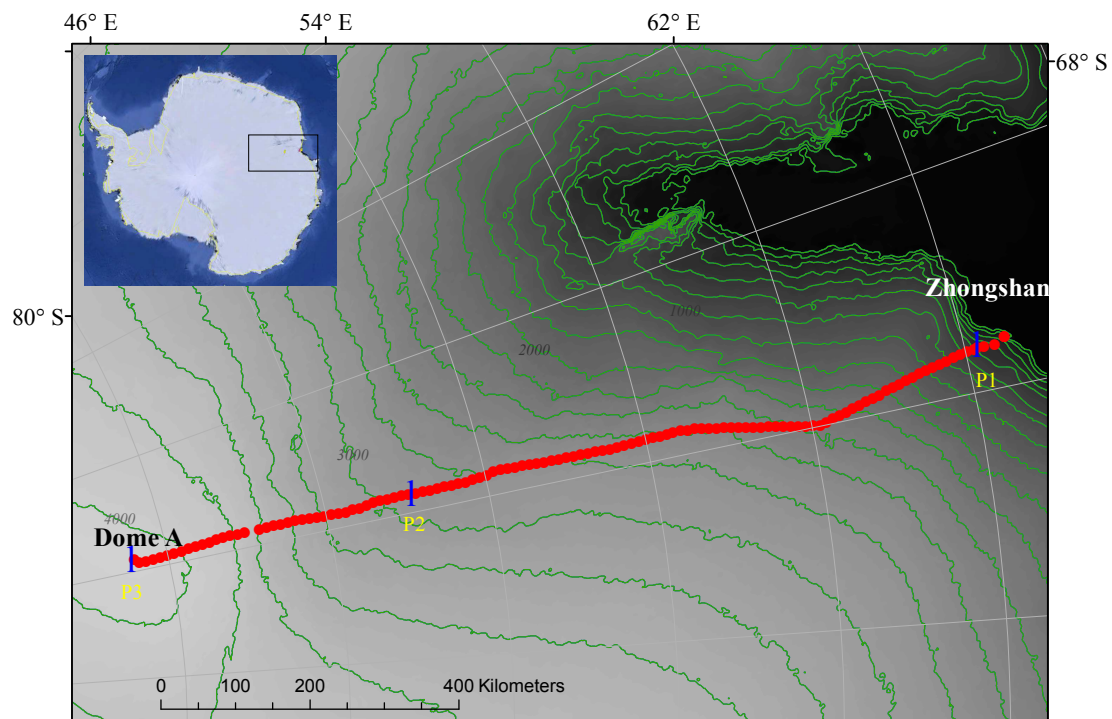

19  
20 **Figure S1.** The Chinese inland investigation traverse from the coast (Zhongshan Station) to the ice  
21 sheet summit, Dome A, East Antarctica. The traverse is generally along the 77.0 °E longitude.  
22

23

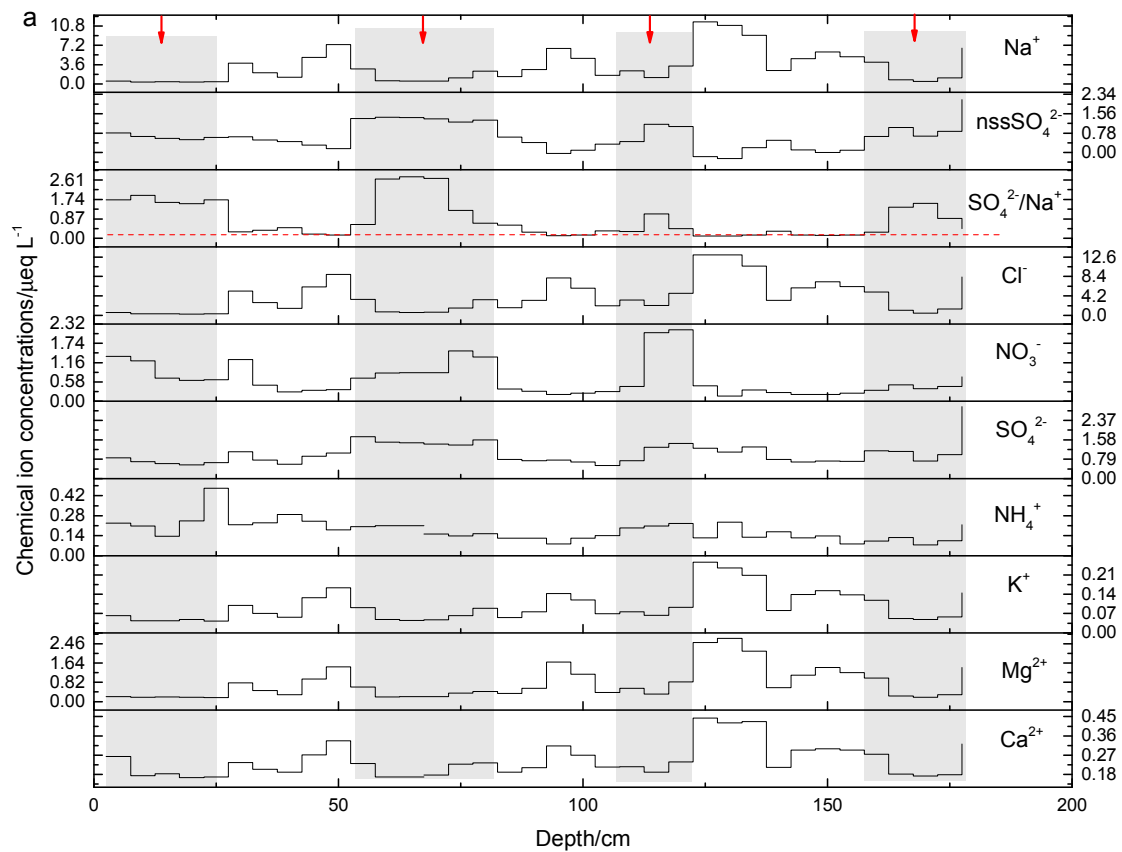

24

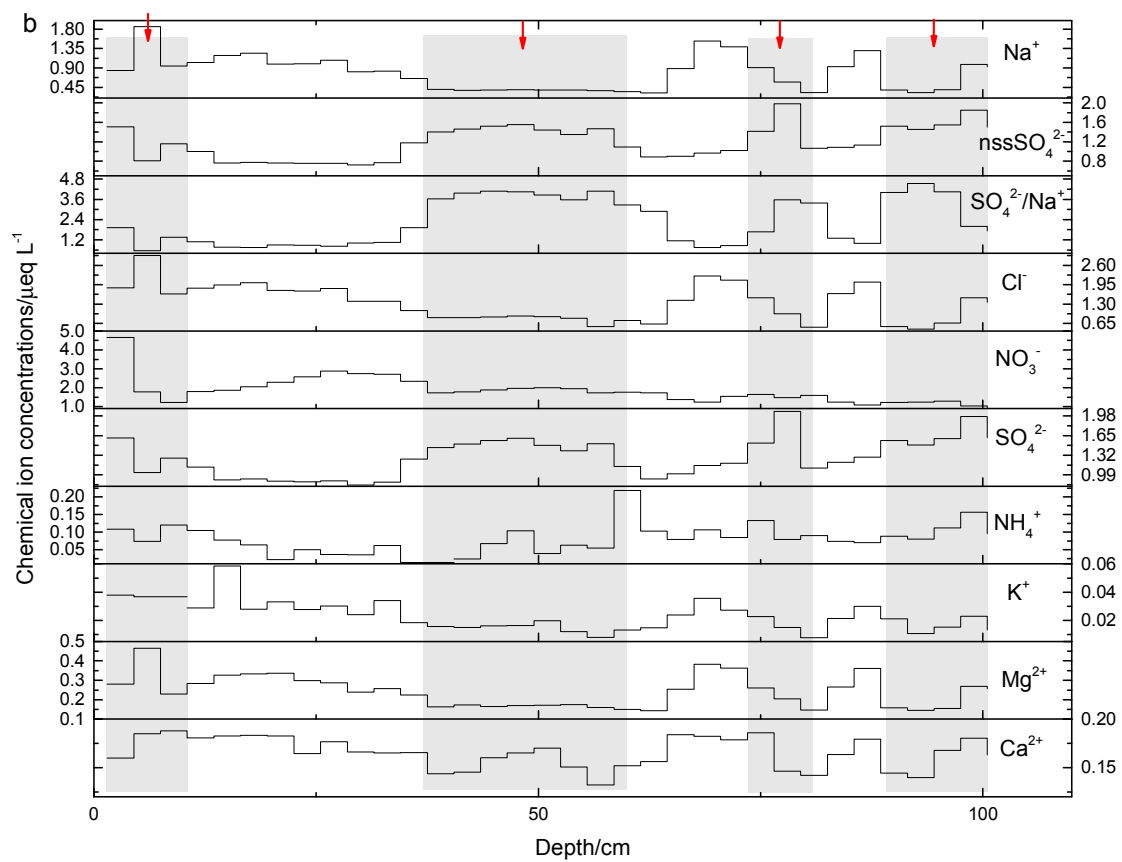

25

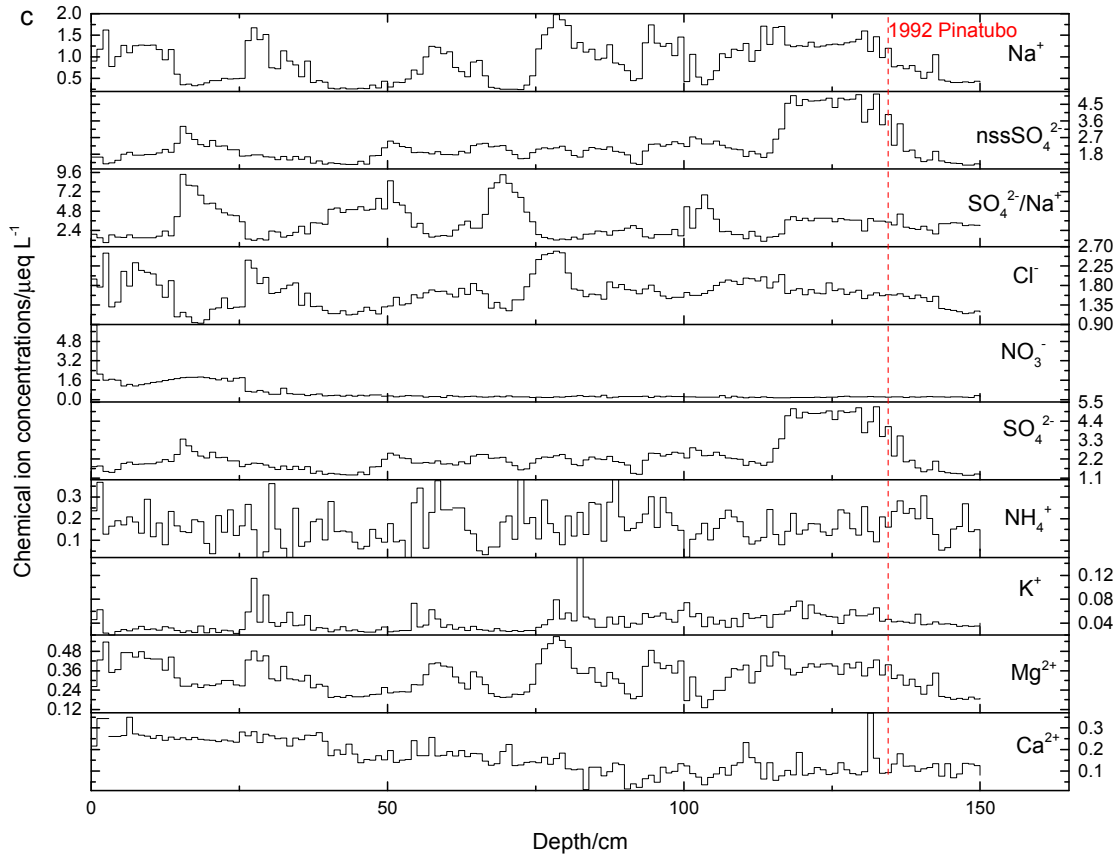

26  
 27 **Figure S2.** Profiles of chemical ions in snow pits P1 (a), P2 (b), and P3 (c). Snow pits P1 and P2 were  
 28 sampled in the summer season in 2015-2016, and P3 was sampled in January 2010. The ratios of  
 29  $\text{SO}_4^{2-}/\text{Na}^+$  in snow samples were also present. Red arrows in panels (a) and (b) represent the middle of  
 30 the identified summer, and shaded areas denote summer seasons. (It is difficult to assign the samples in  
 31 the snow pits to the four distinct seasons based on the measured parameters, and thus we choose a  
 32 conservative assignment method, i.e., a summer season featured with higher  $\text{nssSO}_4^{2-}$  and  $\text{SO}_4^{2-}/\text{Na}^+$   
 33 ratio (and lower  $\text{Na}^+$ ) and a winter season characterized with the opposite patterns.) The red dashed line  
 34 in panel (a) represents the ratio of  $\text{SO}_4^{2-}/\text{Na}^+$  in bulk seawater, while the red dashed line in panel (c)  
 35 signifies the first snow sample significantly influenced by the Pinatubo eruption.  
 36

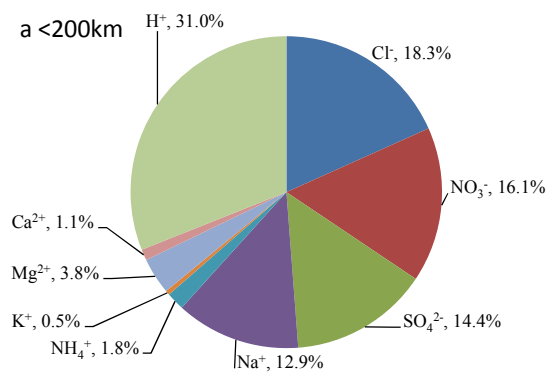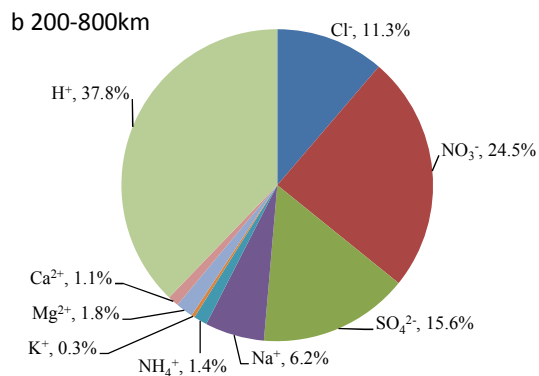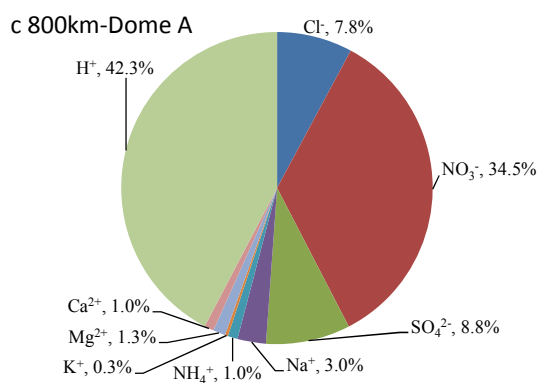

37

38

39 **Figure S3.** Contribution percentages of each ion to the total in different regions on the traverse, in  $\mu\text{eq}$   
 40  $\text{L}^{-1}$ . The percentages of each ion in individual regions were calculated from the averages of all sites  
 41 within the region.

42

43

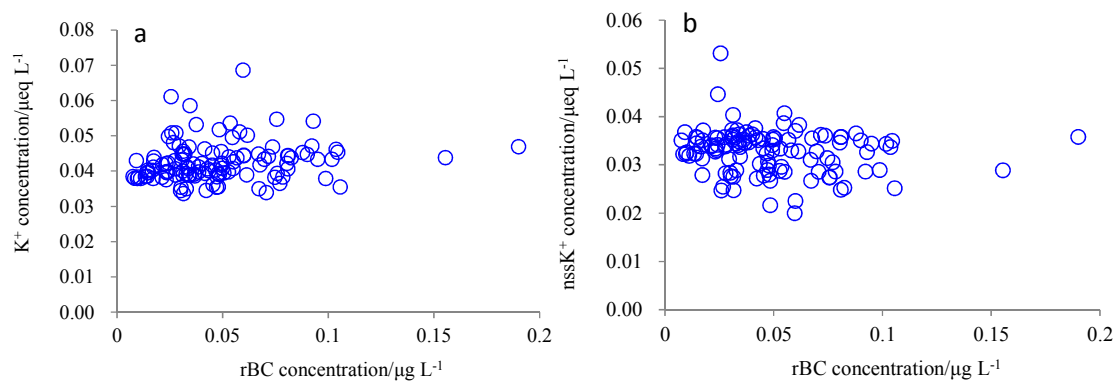

44

45 **Figure S4.** Correlations between refractory black carbon (rBC) and K<sup>+</sup> (nssK<sup>+</sup>) in Antarctic surface  
46 snow collected in 2012-2013 campaign. The rBC analysis system consists of an ultrasonic nebulizer  
47 and desolvation system (CETAC UT5000) coupled with a Single Particle Soot Photometer (SP2,  
48 Droplet Measurement Technologies, Boulder, Colorado).

49

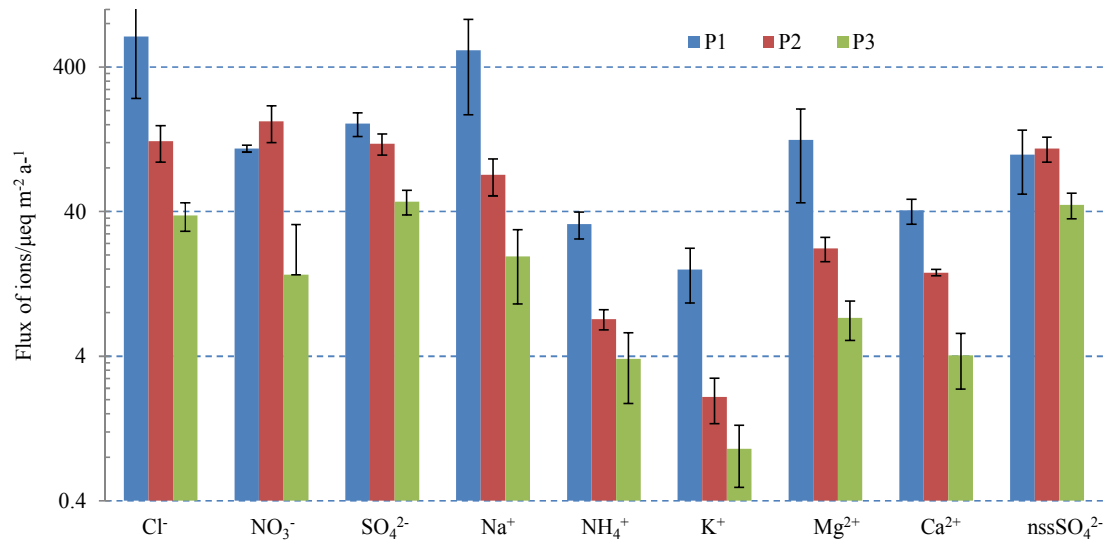

50

51 **Figure S5.** Ion fluxes at the three pits (P1, P2, and P3). The error bars represent one standard deviation  
 52 of fluxes in different years. Note that a base-10 log scale is used for the y-axis.

53
